# Supplementary material for: Iron phthalocyanine in non-aqueous medium forming layer-by-layer films: growth mechanism, molecular architecture and applications
Source: Royal Society of Chemistry journal article supplement (doi:10.1039/b922242c), 2010-01-01
Supplement: b922242c.pdf [file b922242c.pdf]

**Iron Phthalocyanine in Non-Aqueous Medium Forming Layer-by-Layer Films:  
Growth Mechanism, Molecular Architecture, and Application**

Priscila Alessio, Maria Luz Rodríguez-Méndez, Jose Antonio De Saja Saez, Carlos José

Leopoldo Constantino

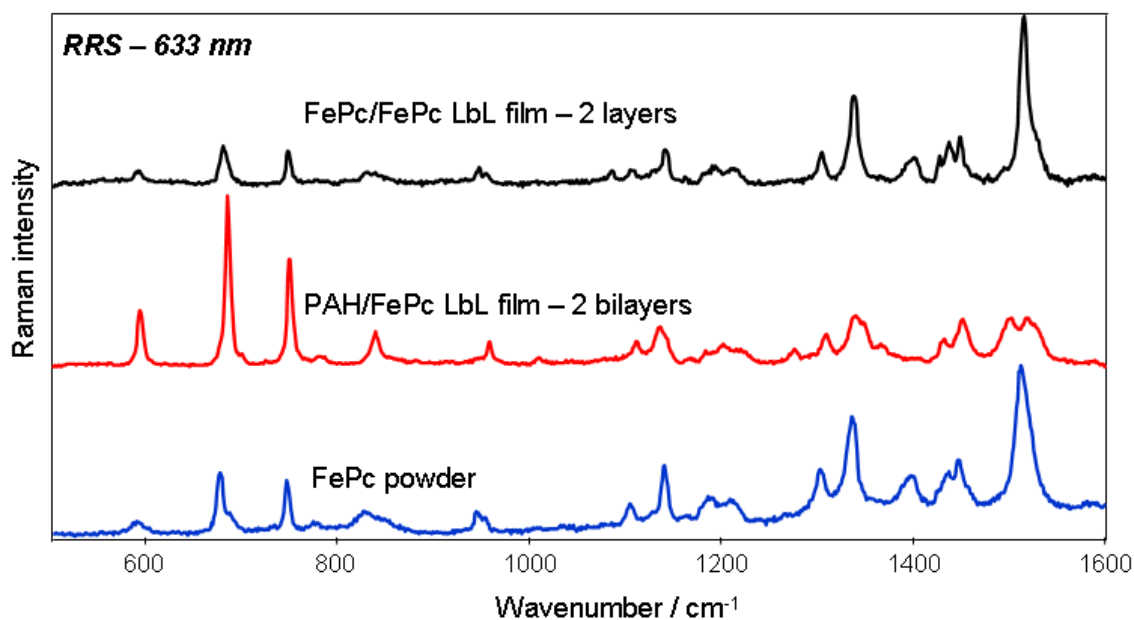

Figure ESI 1: Resonance Raman spectra (RRS) recorded with the 633 nm laser line for FePc powder and LbL films containing 2 bilayers of PAH/FePc and 2 layers of FePc/FePc.

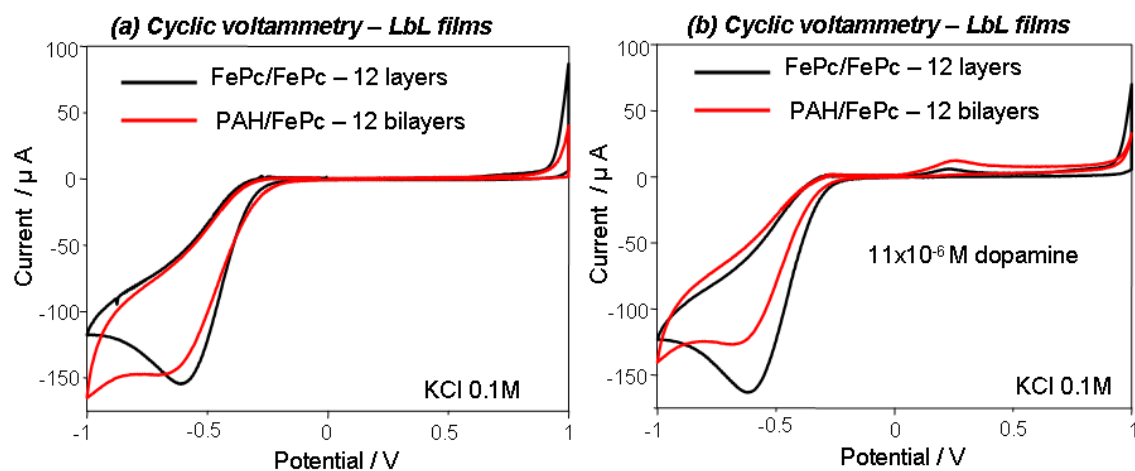

Figure ESI 2: cyclic voltammograms recorded with 100 mV/s in 0.1 M KCl for LbL films with 12 bilayers of PAH/FePc and 12 layers of FePc/FePc (a) with and (b) without dopamine at  $11 \times 10^{-6}$  M.
